# Supplementary material for: An improved method for extraction of polar and charged metabolites from cyanobacteria
Source: PubMed Central journal article supplement (PMC6171824; doi:10.1371/journal.pone.0204273), 2018-10-04
Supplement: pone.0204273.s001.pdf [file pone.0204273.s001.pdf]

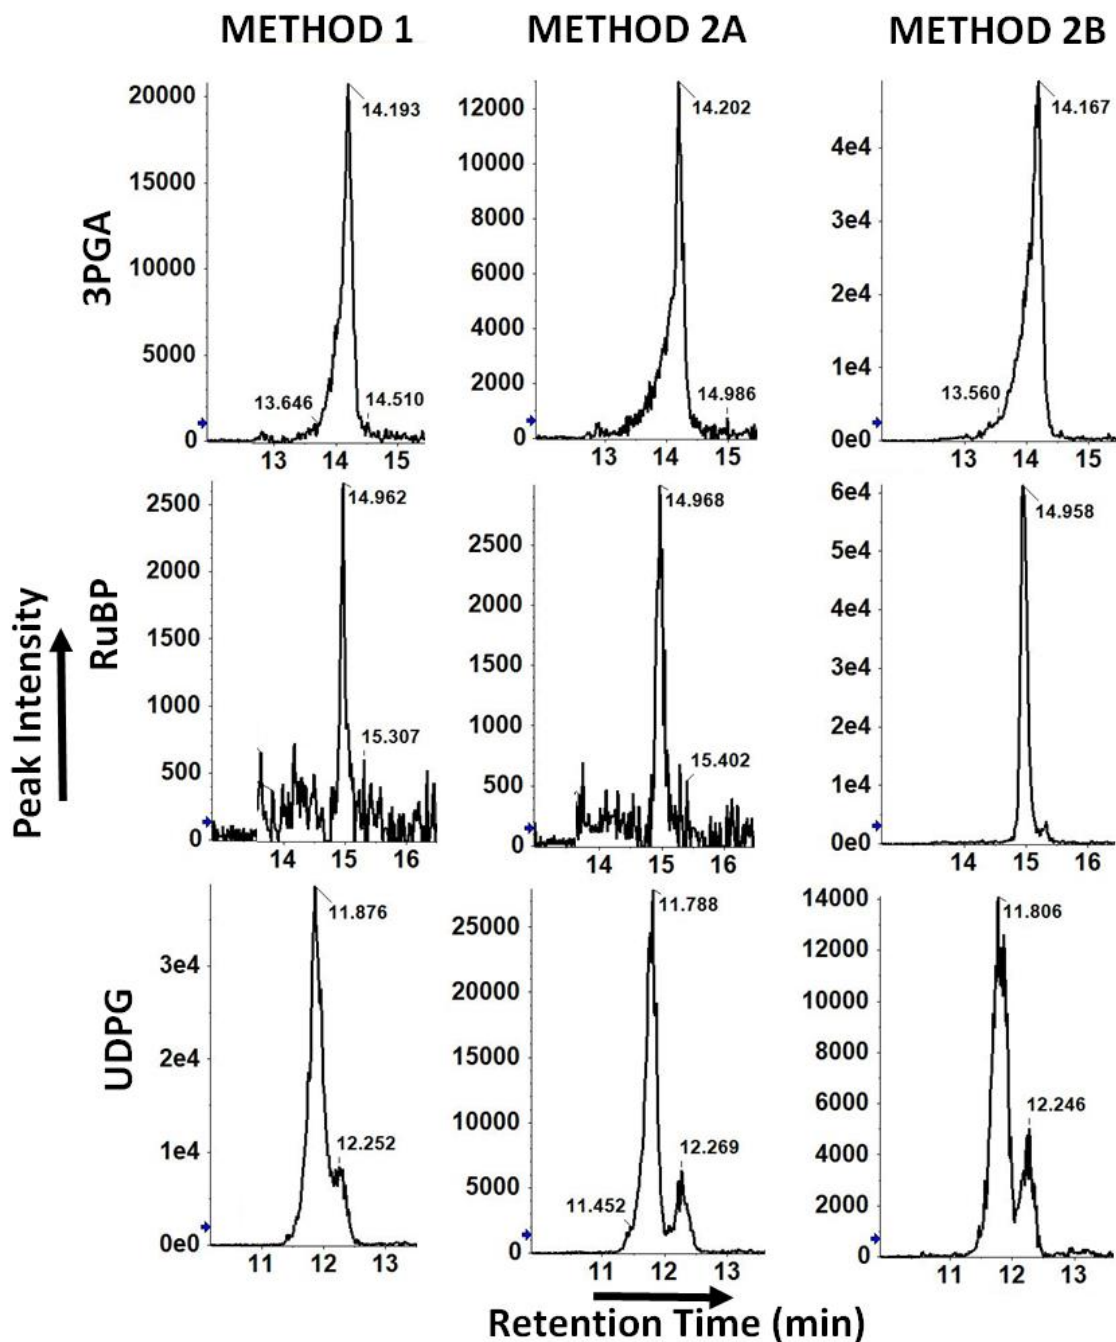

1  
2 **S1 Fig: Comparison of the peak quality for a few metabolites extracted from strain PCC**  
3 **7002 using the three extraction methods.** The extracted ion chromatogram (XIC) of the  
4 metabolites 3-PGA, RuBP, and UDPG, which are significant in the  $^{13}\text{C}$ -MFA studies of  
5 photosynthetic organisms, obtained using the three methods are shown here to compare the  
6 extraction efficiency. The effect of addition of  $\text{NH}_4\text{OH}$  is prominent with metabolites such as  
7 RuBP and is significant for metabolites such as 3-PGA. Few other metabolites such as UDPG did  
8 not have significant change with the addition of  $\text{NH}_4\text{OH}$ . The metabolites presented are 3  
9 Phosphoglyceric acid (3 PGA), Uridine diphosphate glucose (UDPG), and Ribulose 1,5-  
10 bisphosphate (RuBP).
